# Supplementary material for: Simvastatin, edaravone and dexamethasone protect against kainate-induced brain endothelial cell damage
Source: PubMed Central journal article supplement (PMC7008534; doi:10.1186/s12987-019-0166-1), 2020-02-10
Supplement: 12987_2019_166_MOESM1_ESM.pdf [file 12987_2019_166_MOESM1_ESM.pdf]

## **Additional file 1: Detailed protocol, additional figures and tables.**

---

### **Simvastatin, edaravone and dexamethasone protect against kainate-induced brain endothelial cell damage**

Lilla Barna, Fruzsina R. Walter, András Harazin, Alexandra Bocsik, András Kincses, Vilmos Tubak, Katalin Jósvay, Ágnes Zvara, Patricia Campos-Bedolla, Mária A Deli

---

#### **Detailed protocol**

Primary rat brain endothelial cells were isolated from three-week-old male and female Wistar rats (Harlan Laboratories, USA), as it is described in our previous papers [Walter et al., 2016; Harazin et al., 2018]. Animals were sacrificed with CO<sub>2</sub> then forebrains were collected in phosphate buffered saline (PBS) on ice. After removing meninges, the tissue was cut into 1 mm<sup>3</sup> pieces and enzymatically digested by 1 mg/ml collagenase type II (Roche, Switzerland), and 15 µg/ml deoxyribonuclease type I (Roche, Switzerland) in Dulbecco's modified Eagle medium/Nutrient Mixture F-12 (DMEM/F12, Gibco, Life Technologies, USA) for 55 min at 37 °C. After the digestion the cells were mixed with 20% bovine serum albumin (BSA)-DMEM and centrifuged three times (1,000 × g, 20 min) to separate the brain microvessel fraction from the myelin rich brain tissue fraction. After each centrifugation step the cell pellets were collected and pooled. The collected microvessels were further digested by 1 mg/ml collagenase-dispase (Roche, Switzerland) in DMEM/F12 containing 15 µg/ml deoxyribonuclease type I (Roche, Switzerland) for 35 min at 37 °C. Brain microvascular endothelial cell clusters were separated on a 33 % Percoll gradient (1,000 × g, 10 min) then collected and washed twice in DMEM/F12. Cells were seeded onto collagen type IV and fibronectin coated (100 µg/ml each) Petri dishes (100 mm; Corning, USA). Cells were maintained in DMEM-F12 supplemented with 15 % plasma-derived bovine serum (PDS; First Link, UK), 5 µg/ml insulin, 5 µg/ml transferrin, 5 ng/ml sodium selenite (Pan Biotech, Germany), 10 mM HEPES, 1 ng/ml basic fibroblast growth factor, 100 µg/ml heparin and 50 µg/ml gentamycin. During the first three days of culture the capillary endothelial cells were kept in culture medium containing 3 µg/ml puromycin to eliminate P-glycoprotein negative cell types [Perrière et al., 2005]. Cells were used at the first passage for experiments. Primary rat brain pericytes were isolated by the same protocol, except that puromycin treatment was not applied. After isolation pericytes were seeded onto collagen type IV coated

(100 µg/ml) Petri dishes (60 mm; VWR International, USA) and cultured in DMEM medium (Gibco, Life Technologies, USA) containing 10 % fetal bovine serum (FBS, Pan Biotech, Germany) and gentamycin (50 µg/ml). Cells were used at the third passage for experiments.

Primary rat astrocytes were obtained from 1-day-old Wistar rats. Meninges were removed then the brain tissue was mechanically dissociated with a long needle connected to a syringe. The homogenate was filtered through a nylon mesh (40 µm, Millipore, USA) to remove larger vessels and tissue debris. Cell clusters were plated onto uncoated 75 cm<sup>2</sup> flasks (TPP, Switzerland) and cultured in DMEM supplemented with 10 % FBS and gentamycin (50 µg/ml) until they reached 90 % confluency. For the BBB co-culture model cells were cultured for 2 weeks (first passage) before use in appropriate collagen type IV (100 µg/ml) coated 12-well plates (Corning, USA) at a cell number of  $5 \times 10^4$  cells/well. Confluent glia cultures included 90 % GFAP immunopositive astroglia and 10 % CD11b immunopositive microglia.

Brain endothelial cells were co-cultured with brain pericytes and astrocytes to induce the BBB characteristics [Nakagawa et al., 2009]. First pericytes ( $1.5 \times 10^4$  cells/cm<sup>2</sup>) were passaged to the bottom side of the 12-well format culture inserts (Transwell clear, polyester membrane, 0.4 µm pore size, 1.12 cm<sup>2</sup> surface; Corning, USA) coated with collagen type IV (100 µg/ml), then brain endothelial cells ( $7.5 \times 10^4$  cells/cm<sup>2</sup>) were added to the upper side coated with collagen type IV and fibronectin (100 µg/ml each). The inserts were placed into 12-well plates containing confluent astrocyte layers. Endothelial culture medium was added to both compartments. Cells were co-cultured for four days before experiments [Perrière et al., 2005].

Harazin A, Bocsik A, Barna L, Kincses A, Váradi J, Fenyvesi F, et al. Protection of cultured brain endothelial cells from cytokine-induced damage by  $\alpha$ -melanocyte stimulating hormone. *PeerJ*. 2018;6:e4774. <https://doi.org/10.7717/peerj.4774>.

Nakagawa S, Deli MA, Kawaguchi H, Shimizudani T, Shimono T, Kittel A, et al. A new blood-brain barrier model using primary rat brain endothelial cells, pericytes and astrocytes. *Neurochem Int*. 2009;54(3-4):253-63. <https://doi.org/10.1016/j.neuint.2008.12.002>.

Perrière N, Demeuse P, Garcia E, Regina A, Debray M, Andreux JP, et al. Puromycin-based purification of rat brain capillary endothelial cell cultures. Effect on the expression of blood-brain barrier-specific properties. *J Neurochem*. 2005;93(2):279-89.

Walter FR, Valkai S, Kincses A, Petneházi A, Czeller T, Veszélka S, et al. A versatile lab-on-a-chip tool for modeling biological barriers, *Sensors and Actuators B: Chemical*. 2016;222:1209-19. <https://doi.org/10.1016/j.snb.2015.07.110>.

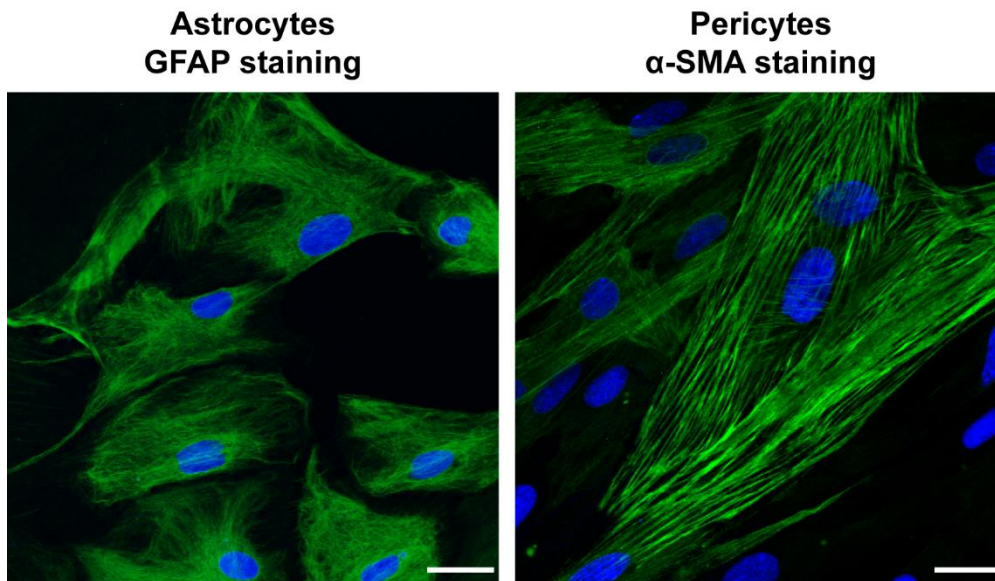

**Figure S1.** Characterization of primary rat astrocytes and pericytes. Cell morphology was characterized by glial fibrillary acidic protein (GFAP, astroglia) and  $\alpha$ -smooth muscle actin ( $\alpha$ -SMA, pericyte) immunostaining and visualized by confocal microscopy (Leica TCS SP5, confocal laser scanning microscope; Leica Microsystems, Germany). Cells were fixed with cold acetone-methanol solution (1:1) for 10 min, washed with phosphate buffered saline (PBS) and non-specific binding sites were blocked with 3% BSA-PBS for 1 h at room temperature. Incubation with mouse anti- $\alpha$ -SMA (Dako, USA) and mouse anti-GFAP primary antibodies lasted overnight at 4 °C. Cells were incubated with anti-rabbit secondary antibody labeled with Cy3 or anti-mouse secondary antibody labeled with Alexa Fluor 488 (Life Technologies, USA) and H33343 dye to stain nuclei for 1 h at room temperature. Between incubations cells were washed three times with PBS. Scale bar = 25  $\mu$ m.

---

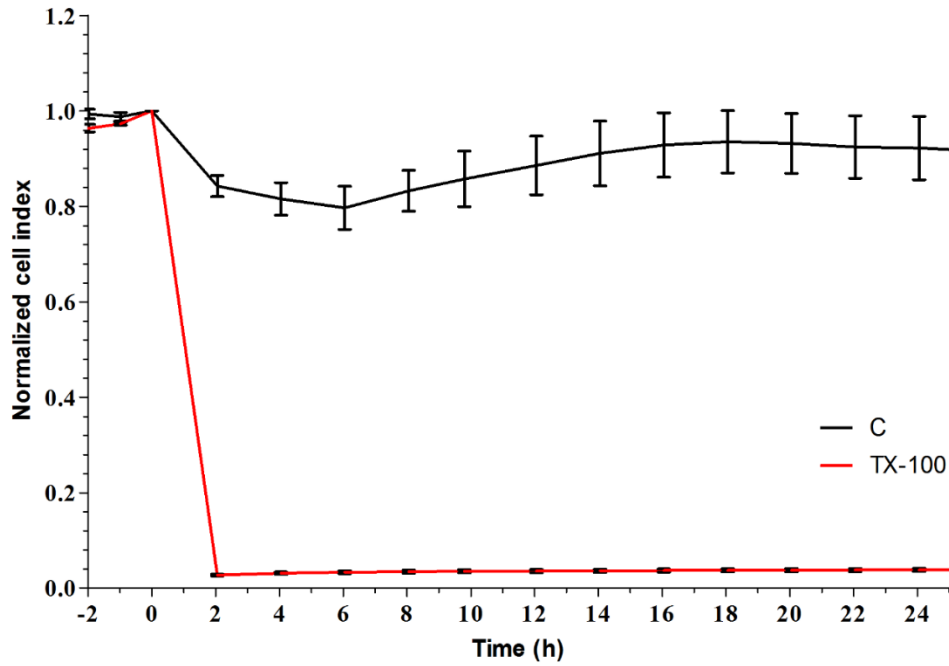

**Figure S2.** Effect of Triton X-100 (TX-100) on cell viability measured by impedance kinetics. Triton X-100 detergent was used at 1% concentration as a reference compound to cause cell death. The impedance of the control group (C) remained stable during the 24-h period.

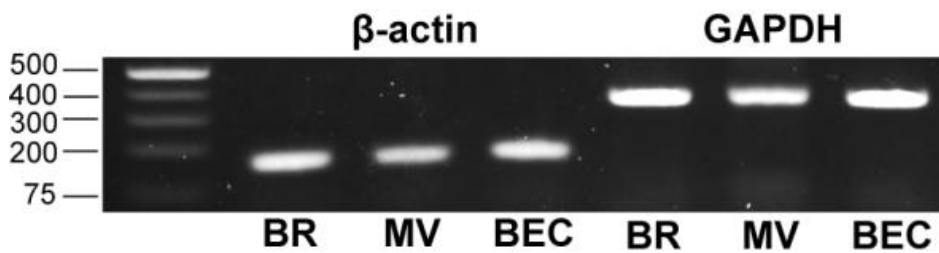

**Figure S3.** Expression of housekeeping genes ( $\beta$ -actin and glyceraldehyde 3-phosphate dehydrogenase – GAPDH) in rat brain cortex (BR), isolated rat brain microvessels (MV) and primary rat brain endothelial cells (BEC). The predicted length of the products is shown in Table S2. Fragments were visualized on 2% agarose gel. M: 1 kb Plus DNA ladder.

**Table S1.** Origin and catalogue number of reagents used in this study

| <b>Product name</b>                                               | <b>Company</b>             | <b>Country</b> | <b>Catalogue number</b> |
|-------------------------------------------------------------------|----------------------------|----------------|-------------------------|
| collagenase type II                                               | Roche                      | Switzerland    | C6885                   |
| deoxyribonuclease type I                                          | Roche                      | Switzerland    | D4513                   |
| Dulbecco's modified Eagle medium (DMEM)                           | Gibco, Life Technologies   | USA            | 21885025                |
| Dulbecco's Modified Eagle Medium/Nutrient Mixture F-12 (DMEM/F12) | Gibco, Life Technologies   | USA            | 31331028                |
| bovine serum albumin (BSA)                                        | Sigma, Merck               | Germany        | A7906                   |
| collagenase-dispase                                               | Roche                      | Germany        | 11097 113001            |
| Percoll                                                           | Sigma, Merck               | Germany        | P4937                   |
| collagen type IV                                                  | Sigma, Merck               | Germany        | C5533                   |
| fibronectin                                                       | Sigma, Merck               | Germany        | F1141                   |
| plasma-derived bovine serum (PDS)                                 | First Link                 | UK             | 60-00-850               |
| insulin                                                           | Pan Biotech                | Germany        | P07-03110               |
| transferrin                                                       |                            |                |                         |
| sodium selenite                                                   |                            |                |                         |
| Hepes                                                             | Sigma, Merck               | Germany        | H4034                   |
| basic fibroblast growth factor                                    | Sigma, Merck               | Switzerland    | F0291                   |
| heparin                                                           | Sigma, Merck               | Germany        | H3149                   |
| gentamycin                                                        | Sigma, Merck               | Germany        | G1397                   |
| puromycin                                                         | Sigma, Merck               | Germany        | P7255                   |
| fetal bovine serum (FBS)                                          | Pan Biotech                | Germany        | P30-3702                |
| kainic acid                                                       | Sigma, Merck               | Germany        | K-0250                  |
| simvastatin                                                       | Sigma, Merck               | Germany        | S-6196                  |
| edaravone                                                         | Sigma, Merck               | Germany        | M70800                  |
| dexamethasone                                                     | Sigma, Merck               | Germany        | D2915                   |
| hydrogen peroxide (H <sub>2</sub> O <sub>2</sub> )                | Molar Chemicals            | Hungary        | 03650                   |
| sodium nitroprusside (SNP)                                        | Sigma, Merck               | Germany        | 71778                   |
| collagen type I                                                   | isolated in our laboratory | -              | -                       |
| TriFast reagent                                                   | VWR International          | USA            | 30-2010                 |
| Maxima First Strand cDNA Synthesis Kit                            | Thermo Fisher              | USA            | K1671                   |
| FIREPol DNA Polymerase                                            | Solis BioDyne              | Estonia        | 01-01-01000             |

|                                                                    |                                     |         |            |
|--------------------------------------------------------------------|-------------------------------------|---------|------------|
| agarose                                                            | VWR International                   | USA     | 443666A    |
| Evans blue                                                         | Sigma-Aldrich                       | USA     | E2129      |
| sodium fluorescein                                                 | Sigma-Aldrich                       | USA     | F6377      |
| chloromethyl-dichloro-dihydro-fluorescein diacetate (DCFDA)        | Molecular Probes, Life Technologies | USA     | C6827      |
| 4-amino-5-methylamino-2',7'-difluorofluorescein diacetate (DAF-FM) | Molecular Probes, Life Technologies | USA     | D23844     |
| pluronic acid                                                      | Molecular Probes, Life Technologies | USA     | P6867      |
| paraformaldehyde                                                   | Sigma-Aldrich                       | USA     | 441244     |
| Triton-X100                                                        | AppliChem                           | Germany | A4975      |
| rabbit anti-claudin-5 polyclonal antibody                          | Sigma-Aldrich                       | USA     | SAB4502981 |
| rabbit anti-ZO-1 polyclonal antibody                               | Invitrogen                          | USA     | 61-7300    |
| anti-rabbit secondary antibody conjugated with Cy3                 | Sigma-Aldrich                       | USA     | C2306      |
| H33342 nucleus stain                                               | Calbiochem                          | USA     | 382065     |
| Fluoromount-G                                                      | Southern Biotech                    | USA     | 0100-01    |

**Table S2.** Rat-specific primers used for RT-PCR.

| <b>Primer name</b>      |    | <b>Sequence</b>              | <b>T<sub>m</sub> (°C)</b> | <b>Amplicon length (bp)</b> | <b>Gene ID</b> |
|-------------------------|----|------------------------------|---------------------------|-----------------------------|----------------|
| <b>GluK1/<br/>GluR5</b> | fw | GGTATAACCCCCACCCATGCAACC     | 58                        | 314                         | NM_017241.2    |
|                         | rv | GAAGGTCATCGTCGAGCCATCTCTG    |                           |                             |                |
| <b>GluK2/<br/>GluR6</b> | fw | GGTATAACCCACACCCTTGCAACC     | 56                        | 452                         | NM_019309.2    |
|                         | rv | TGACTCCATTAAGAAAGCATAATCCGA  |                           |                             |                |
| <b>GluK3/<br/>GluR7</b> | fw | CTTCTTCAAGAAATCCAAGATCTCCACC | 57                        | 483                         | NM_181373.3    |
|                         | rv | TGCTCCC GTTCCGCTGTCTTGC      |                           |                             |                |
| <b>GluK4/<br/>KA-1</b>  | fw | TACTCTCTGGGCAACAGCCT         | 56                        | 289                         | NM_012572.1    |
|                         | rv | AGGTCTGGTAGCGGGAATTT         |                           |                             |                |
| <b>GluK5/<br/>KA-2</b>  | fw | TCGCCCCGTGTCCTCAACTCA        | 55                        | 398                         | NM_031508.2    |
|                         | rv | CACCGACACCTCCTCAGACTCCG      |                           |                             |                |
| <b>nNOS/<br/>NOS1</b>   | fw | TCTACGCCACAGAGACAGGCAAAT     | 51                        | 92                          | NM_052799      |
|                         | rv | CATGGACATTGCCTTGGCATCGAA     |                           |                             |                |
| <b>iNOS/<br/>NOS2</b>   | fw | AGCATCCCAAGTACGAGT           | 48                        | 140                         | NM_012611      |
|                         | rv | AATCTCGGTGCCCATGTA           |                           |                             |                |
| <b>eNOS/<br/>NOS3</b>   | fw | CGGAGAATGGAGAGAGCTTT         | 50                        | 113                         | NM_021838      |
| <b>β-actin</b>          | fw | TACTCTGTGTGGATTGGTGGC        | 52                        | 150                         | NM_031144.3    |
|                         | rv | GGTGTA AAAACGCAGCTCAGTAA     |                           |                             |                |
| <b>GAPDH</b>            | fw | GGTCATCAACGGGAAACCC          | 55                        | 356                         | NM_017008.4    |
|                         | rv | TCTGAGTGGCAGTGATGGCA         |                           |                             |                |
